# Supplementary material for: Assessment of Dye-Absorbed Eggshell Membrane Composites as Solid Polymer Electrolyte of Fuel Cells
Source: MDPI journal article supplement (doi:10.3390/membranes13010115), 2023-01-16
Supplement: s1 [file s1]

# Assessment of Dye-absorbed Eggshell Membrane Composites as Solid Polymer Electrolyte of Fuel Cells

Naoki Tanifuji\*, Takeshi Shimizu \*, Kentaro Ida, Kosuke Nishio, Miki Tanaka, Yuta Tsukaguchi, Kentaro Tsubouchi, Akihiro Shimizu, Ei-ichi Hino, Yusuke Date, Kaoru Aoki, Hirofumi Yoshikawa\*

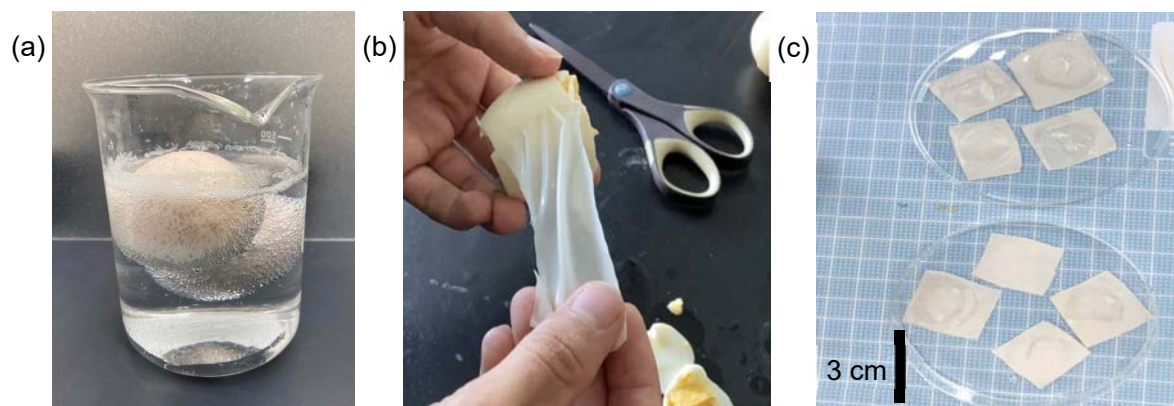

**Figure S1.** Preparation of the ESM. (a) the boiled egg immersed in 2 M HCl. (b) The belt-like ESM. (c) The square-shaped ESM.

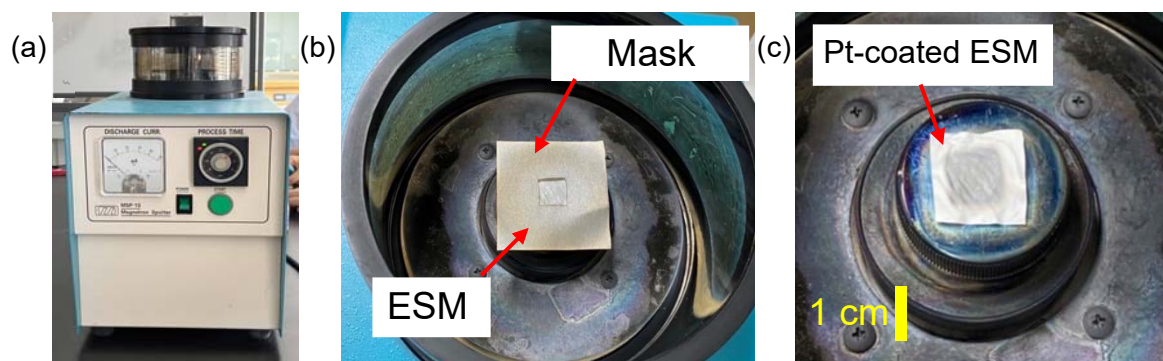

**Figure S2.** The Pt-sputter coating method. (a) The photograph of the magnetron sputtering equipment, MSP-1S. (b) The ESM covered with the mask to sputter Pt. (c) The Pt-coated ESM.

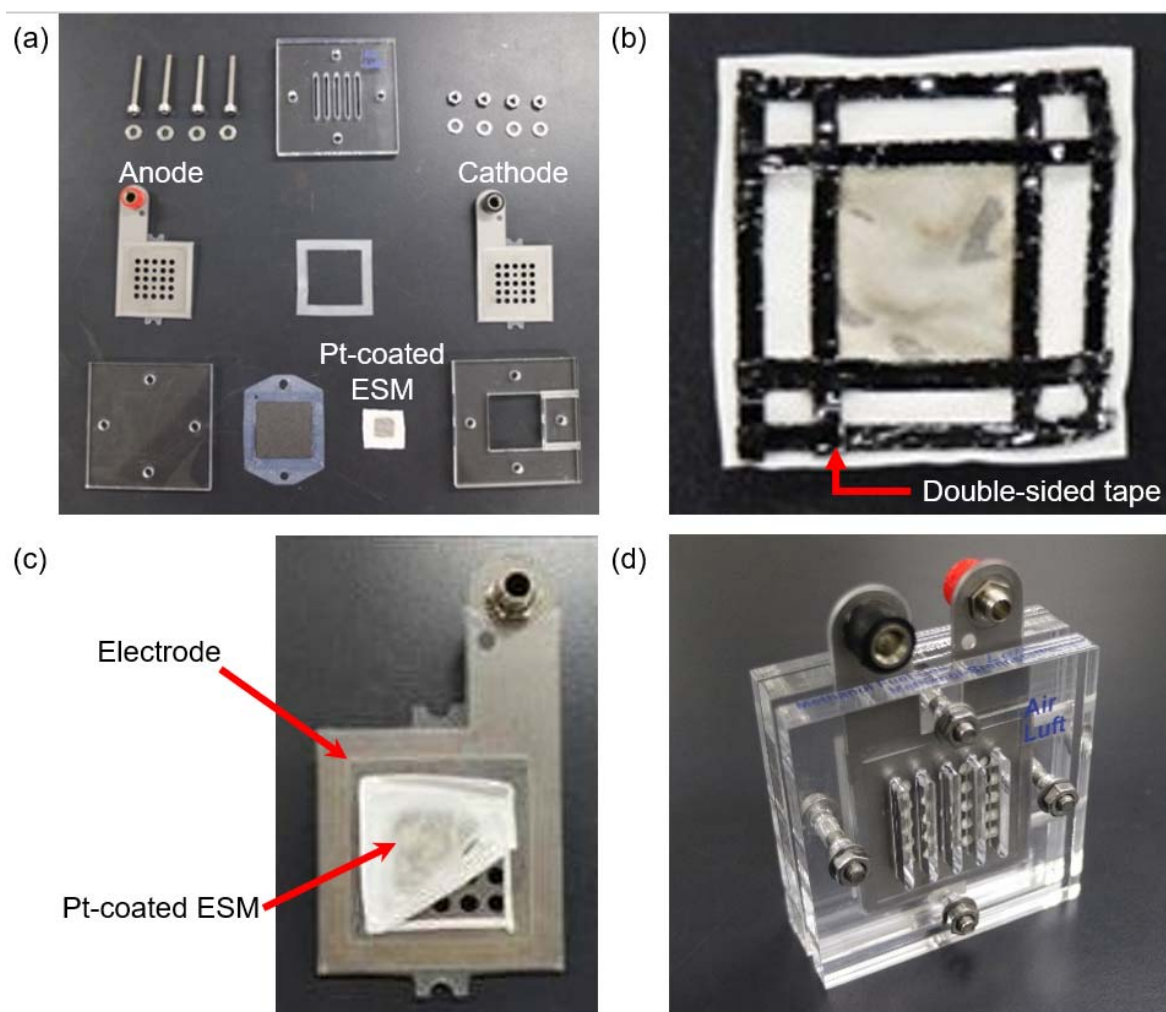

**Figure S3.** (a) The assembly of the PEFCs using ESM. (a) The components of the PEFC. (b) The Pt-coated ESM attached with the double-sided tapes. (c) Pt-coated ESM attached to the electrode. (d) The assembled PEFC.

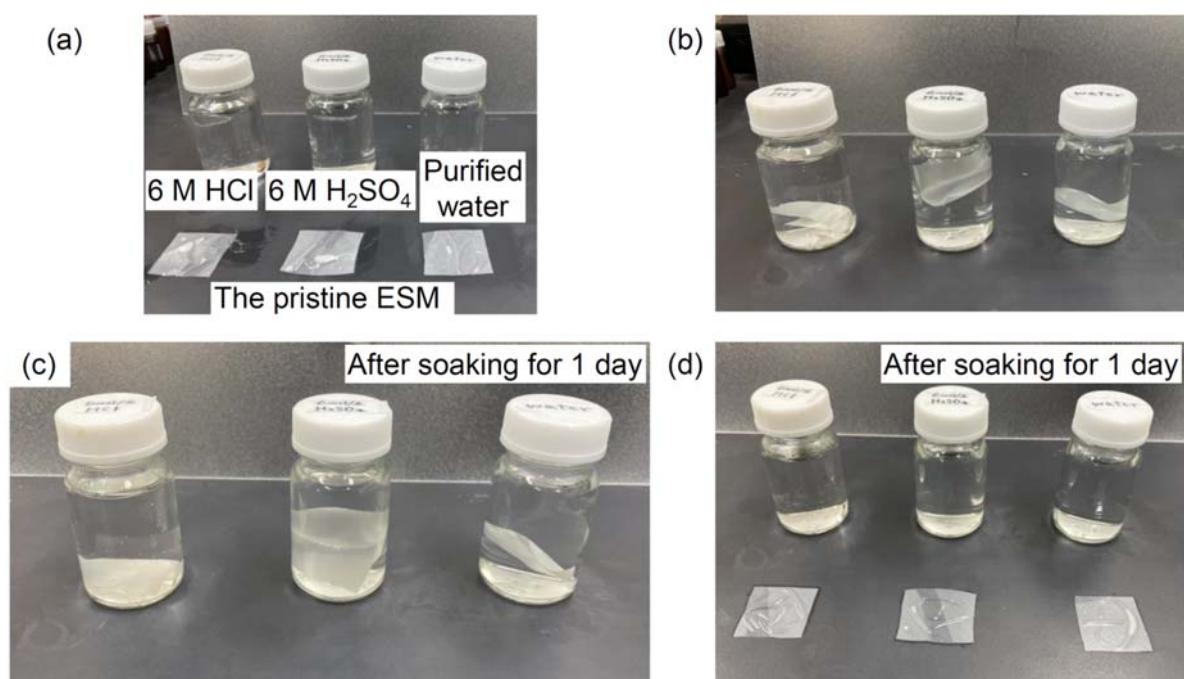

**Figure S4.** The chemical stability of the pristine ESM to strong acids (HCl and H<sub>2</sub>SO<sub>4</sub>). (a) Before soaking the pristine ESM in 6 M HCl, 6 M H<sub>2</sub>SO<sub>4</sub>, and purified water. (b) The pristine ESM soaked in 6 M HCl, 6 M H<sub>2</sub>SO<sub>4</sub>, and purified water. (a) The pristine ESM soaked in 6 M HCl, 6 M H<sub>2</sub>SO<sub>4</sub>, and purified water for one day. (d) After soaking the pristine ESM in 6 M HCl, 6 M H<sub>2</sub>SO<sub>4</sub>, and purified water.

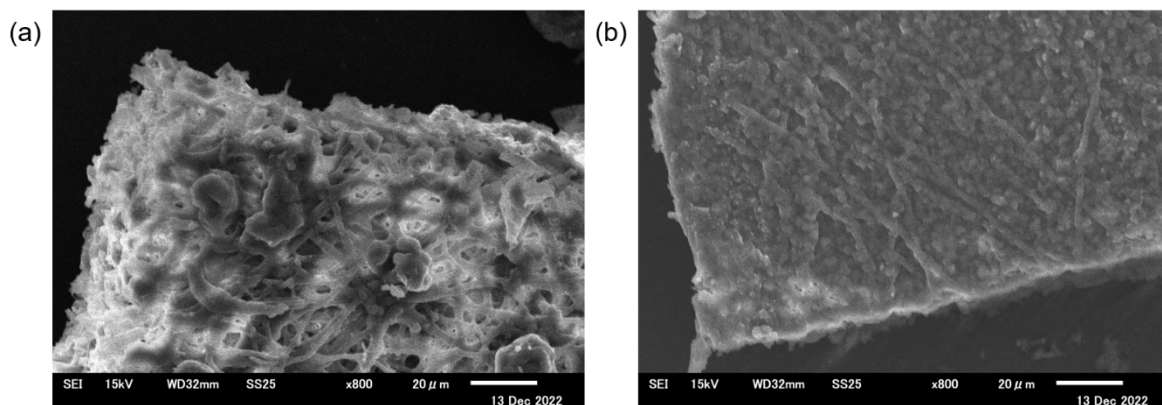

**Figure S5.** SEM images of the front (a) and back (b) of the pristine ESM. The ESM has the interwoven fiber structure with too tiny pores to observe by using SEM.

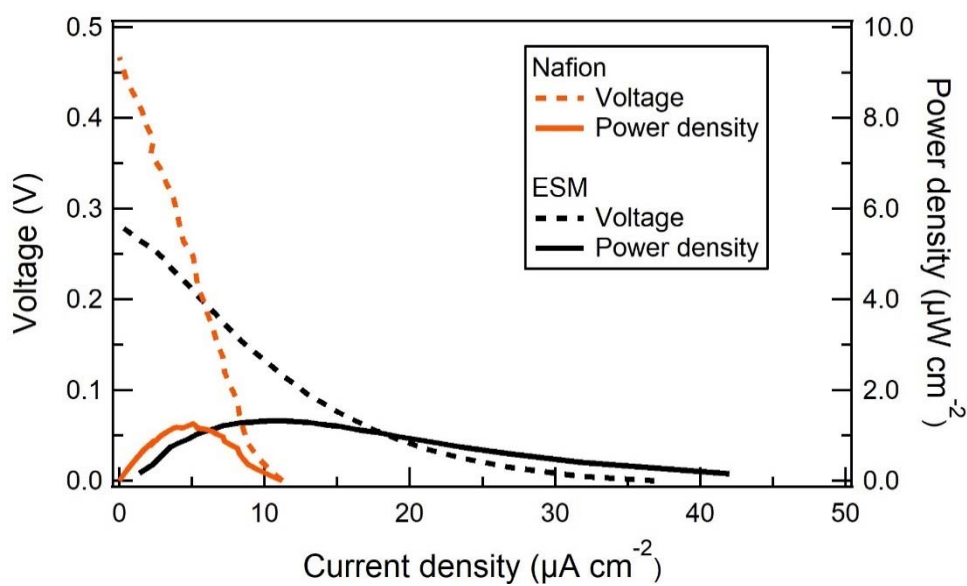

**Figure S6.** The *I*-*V* curve of the FC using Nafion.

**Table S1.** Comparison of performances among the ionomer-free PEMFCs.

| <b>Materials</b>                  | <b>Pt loading<br/>[<math>\mu\text{g cm}^{-2}</math>]</b> | <b>Maximum</b>                                               | <b>Ref</b>       |
|-----------------------------------|----------------------------------------------------------|--------------------------------------------------------------|------------------|
|                                   |                                                          | <b>power<br/>density<br/>[<math>\text{W cm}^{-2}</math>]</b> |                  |
| MPL2A                             | 8.5                                                      | 1.0-1.2                                                      | 28               |
| MPL2B                             | 3.4                                                      | 0.5-0.7                                                      |                  |
| Sputtered-Pt/C                    | 20                                                       | 1.24                                                         | 29               |
| CeO <sub>y</sub> /CN <sub>x</sub> | 1.7                                                      | 0.54-0.65                                                    | 30               |
| ESM                               | 30                                                       | $1.32 \times 10^{-6}$                                        | <b>This work</b> |
| Erythrosine-ESM                   | 30                                                       | $4.88 \times 10^{-6}$                                        | <b>This work</b> |
| Acid Red 52-ESM                   | 30                                                       | $7.23 \times 10^{-6}$                                        | <b>This work</b> |
| Brilliant Blue FCF-ESM            | 30                                                       | $3.25 \times 10^{-6}$                                        | <b>This work</b> |
| Fast Green FCF-ESM                | 30                                                       | $2.61 \times 10^{-6}$                                        | <b>This work</b> |
| Tartrazine-ESM                    | 30                                                       | $3.25 \times 10^{-6}$                                        | <b>This work</b> |
| Sunset Yellow FCF-ESM             | 30                                                       | $3.99 \times 10^{-6}$                                        | <b>This work</b> |

MPL: carbon microporous layer
